# Supplementary material for: Prognostic Factors for Post-COVID-19 Syndrome: A Systematic Review and Meta-Analysis
Source: MDPI journal article supplement (doi:10.3390/jcm11061541), 2022-03-11
Supplement: s1 [file s1]

**Supplemental Table S2** –Risk of bias assessment for the six domains of the QUIPS tool for each study

| First author                      | 1. Study participation | 2. Study attrition | 3. Prognostic factor measurement | 4. Outcome measurement | 5. Adjustment for other prognostic factors <sup>\$</sup> | 6. Statistical analysis and reporting |
|-----------------------------------|------------------------|--------------------|----------------------------------|------------------------|----------------------------------------------------------|---------------------------------------|
| Bellan et al [17]                 | Moderate               | High               | Low                              | Low                    | Low                                                      | Low                                   |
| Blanco et al [18]                 | High                   | High               | Moderate                         | Moderate               | Low                                                      | Moderate                              |
| Eloy et al [19]                   | Low                    | High               | Low                              | Low                    | Low                                                      | Low                                   |
| Fernández-de-Las-Peñas et al [20] | Moderate               | Low                | Low                              | Low                    | Low                                                      | Low                                   |
| García-Abellán et al [21]         | Low                    | High               | Moderate                         | Moderate               | Low                                                      | Low                                   |
| Ghosn et al [22]                  | Low                    | Moderate           | Moderate                         | Moderate               | Low                                                      | Moderate                              |
| Huang et al [23]                  | Moderate               | Moderate           | Low                              | Low                    | Moderate                                                 | Low                                   |
| Li et al [24]                     | High                   | High               | Low                              | Low                    | Moderate                                                 | High                                  |
| Liang et al [25]                  | Moderate               | High               | Low                              | Low                    | Moderate                                                 | Moderate                              |
| Meije et al [26]                  | Moderate               | Moderate           | Low                              | Low                    | Low                                                      | Moderate                              |
| Munblit et al [27]                | Moderate               | Moderate           | Low                              | Low                    | Low                                                      | Low                                   |
| Romero-Duarte et al [28]          | Low                    | Low                | Low                              | Low                    | Moderate                                                 | Moderate                              |
| Shang et al [29]                  | Low                    | Moderate           | Low                              | Low                    | Moderate                                                 | Moderate                              |
| Tarsitani et al [30]              | Moderate               | Moderate           | Moderate                         | Moderate               | Low                                                      | Low                                   |
| Todt et al [31]                   | Low                    | High               | Low                              | Low                    | Moderate                                                 | Moderate                              |
| van den Borst et al [32]          | High                   | Moderate           | Low                              | Low                    | Moderate                                                 | High                                  |
| Wu et al [33]                     | Moderate               | Moderate           | Low                              | Low                    | Low                                                      | Moderate                              |
| Xiong et al [34]                  | Moderate               | High               | Moderate                         | Moderate               | High                                                     | High                                  |
| Zhang et al [35]                  | Low                    | High               | Low                              | Low                    | Moderate                                                 | Low                                   |
| Zhao et al [36]                   | High                   | High               | Low                              | Low                    | Moderate                                                 | Moderate                              |

<sup>\$</sup>**Explanations:** Risk of bias for this domain was assessed considering four elements: absence of multivariable analysis (High); confounding assessment not applied to outcomes and/or PFs of interest (Moderate); adjustment performed without specifying confounding (Low); multivariable analysis performed with variables of interest for the meta-analysis (not applicable).
